Figure S3: The amino acid (AA) distribution for linear signature region Env-gp120 AA86-94 by treatment group for all breakthrough sequences. Each row displays the AA distribution for one site relative to the VRC-B vaccine strain AA. Sequences for each participant are represented by a bar of equal height with the reference sequence AA residue, in black, shown above the midline. Within a bar, colors depict the fraction of the participant's sequences with that AA residue (or insertion or deletion, indicated by a dash). The widths of the bars are scaled so that the total width for each treatment group is the same. The Y-axis label indicates the HXB2 position.

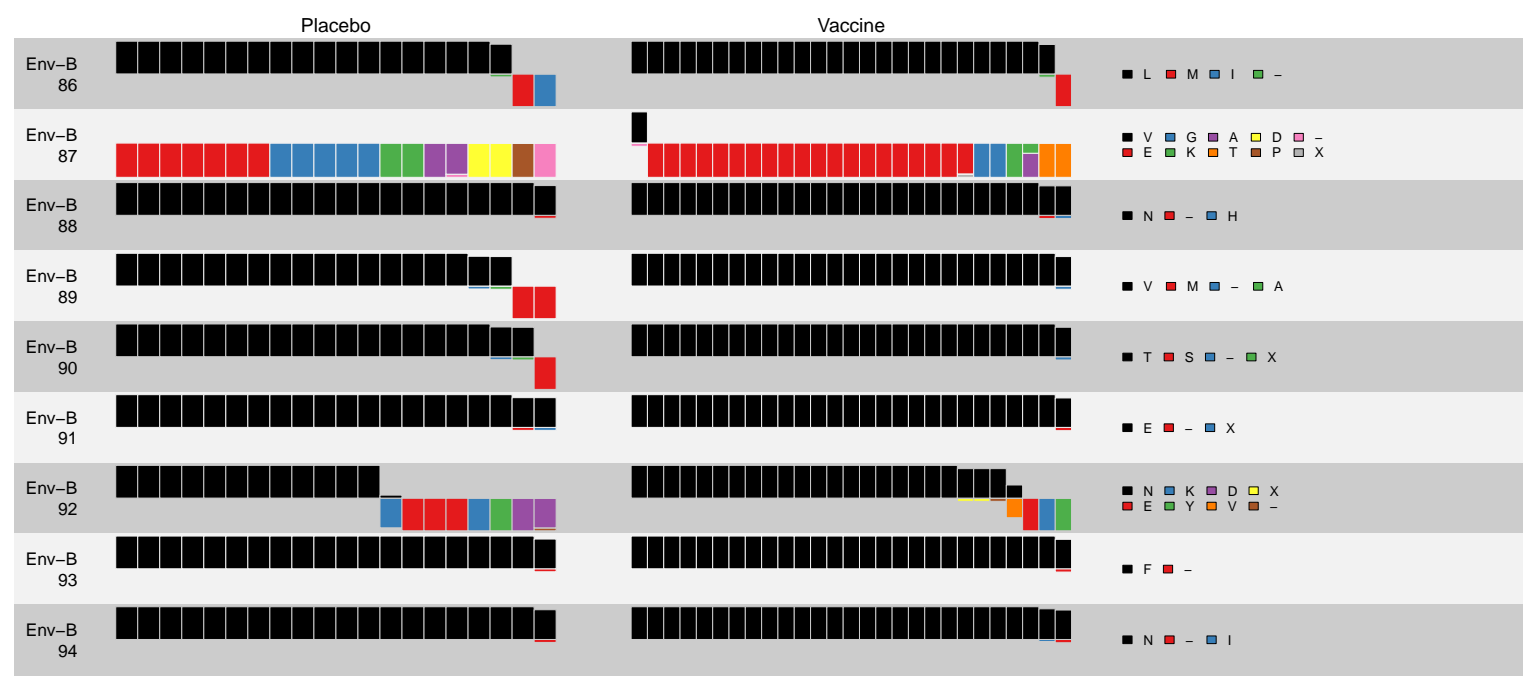

Source: https://geomar-search.kobv.de/redirect.do?ind=27&index=crossrefExt&plv=2&target=crossref_info%3Adoi%2F10.1371%252Fjournal.pone.0185959
