# Supplementary material for: Sieve analysis of breakthrough HIV-1 sequences in HVTN 505 identifies vaccine pressure targeting the CD4 binding site of Env-gp120
Source: PLOS journal article supplement (doi:10.1371/journal.pone.0185959), 2017-11-17
Supplement: S2 (10.1371/journal.pone.0185959.s002) [file journal.pone.0185959.s002]

**Table S2. Non-conserved cysteine residue frequencies in *mindist* sequences.**

Subtype B viruses typically possess 18 cysteine residues forming 9 disulfide bridges in gp120 and 2 cysteine residues in gp41 forming an additional disulfide bridge for a total of 20 conserved cysteine residues. These residues are also conserved in the *mindist* sequences for both treatment groups. Treatment group differences are due to sites of non-conserved cysteine residues in four regions of gp160: 1) gp41 cytoplasmic tail (CT), 2) gp41 transmembrane domain (TM), 3) the V1 variable loop (V1), and 4) the signal peptide (SP). At every site with a non-conserved cysteine residue, the frequency is higher in the vaccine group. The non-conserved cysteine residues in V1 are from two vaccine recipient *mindist* sequences each with one extra pair of cysteines in that region. P-values comparing frequencies by treatment group are non-significant ( $p > 0.05$ ) for any given site; the cysteine counts are only significant when aggregated across sites (see Figure S4).

| Counts and Frequency |        |         |     |         |       |         |
|----------------------|--------|---------|-----|---------|-------|---------|
| HXB2 position        | Region | Placebo |     | Vaccine |       | P-value |
| 10                   | SP     | 3/20    | 15% | 10/27   | 37.0% | 0.11    |
| 13                   | SP     | 0/20    | 0%  | 1/27    | 3.7%  | 1       |
| 28                   | SP     | 19/20   | 95% | 26/27   | 96.3% | 1       |
| 29d                  | SP     | 0/20    | 0%  | 1/27    | 3.7%  | 1       |
| 133b                 | V1     | 0/20    | 0%  | 1/27    | 3.7%  | 1       |
| 133m                 | V1     | 0/20    | 0%  | 2/27    | 7.4%  | 0.5     |
| 143                  | V1     | 0/20    | 0%  | 1/27    | 3.7%  | 1       |
| 699                  | TM     | 0/20    | 0%  | 2/27    | 7.4%  | 0.5     |
| 764                  | CT     | 9/20    | 45% | 18/27   | 66.7% | 0.23    |
| 768                  | CT     | 0/20    | 0%  | 1/27    | 3.7%  | 1       |
| 796                  | CT     | 0/20    | 0%  | 3/27    | 11.1% | 0.25    |
| 837                  | CT     | 3/20    | 15% | 5/27    | 18.5% | 1       |
