# Supplementary material for: Sieve analysis of breakthrough HIV-1 sequences in HVTN 505 identifies vaccine pressure targeting the CD4 binding site of Env-gp120
Source: PLOS journal article supplement (doi:10.1371/journal.pone.0185959), 2017-11-17
Supplement: S7 (10.1371/journal.pone.0185959.s007) [file journal.pone.0185959.s007]

**Table S7. Site scanning signatures.**

Site and method for each site scanning result with a Q-value  $\leq 0.2$ . N is the number of AA sites included for each multiple comparison. The Direction (+ for more or – for fewer mismatches in vaccine than placebo sequences) of the effect is with respect to the subtype B vaccine insert for Env, the vaccine insert for Pol and Nef and Ancestral B for Vif and Vpu. For Q-value and FWER adjustment, multiplicity adjustment was done at the gene level except where noted. One site, Pol 238, passes FWER adjustment (in bold) at the 0.05 level. \*\* Site/property combinations.

| Site                 | Method        | N     | Direction | P-value | Q-value | Adjusted P-value* |
|----------------------|---------------|-------|-----------|---------|---------|-------------------|
| Env 133              | PCP (charged) | 316** | +         | 0.00015 | 0.19    | 0.19              |
| Env 429 <sup>§</sup> | MBS           | 98    | +         | 0.0014  | 0.15    | 0.15              |
| Pol 238              | GWJ           | 180   | –         | 0.0006  | 0.11    | 0.11              |
| Pol 238              | EGWJ          | 245   | –         | 0.0002  | 0.05    | <b>0.05</b>       |
| Pol 238              | QEMD          | 180   | –         | 0.0006  | 0.11    | 0.11              |
| Nef 83               | EGWJ          | 94    | +         | 0.0014  | 0.13    | 0.13              |
| Vif 122              | MBS           | 65    | +         | 0.001   | 0.07    | 0.07              |
| Vpu 69 <sup>#</sup>  | QEMD          | 65    | –         | 0.0018  | 0.08    | 0.08              |
| Vpu 69a <sup>#</sup> | QEMD          | 65    | –         | 0.013   | 0.15    | 0.55              |
| Vpu 69b <sup>#</sup> | QEMD          | 65    | –         | 0.013   | 0.15    | 0.55              |
| Vpu 69c <sup>#</sup> | QEMD          | 65    | –         | 0.013   | 0.15    | 0.55              |

<sup>#</sup>Vpu69-69c signatures are due to insertions in 6 placebo recipient breakthrough *mindist* sequences of between 1 and 4 amino acids.

<sup>§</sup>Multiplicity adjustment is by gene except for Env 429, which is over the set of mAb contact sites.
